# Supplementary material for: Modeling semiconducting silicene nanostrips: electronics and THz plasmons
Source: Frontiers journal article supplement (doi:10.3389/fphy.2023.1198214), 2023-05-10
Supplement: Data_Sheet_1.docx [file Data_Sheet_1.docx]

Supplementary Material


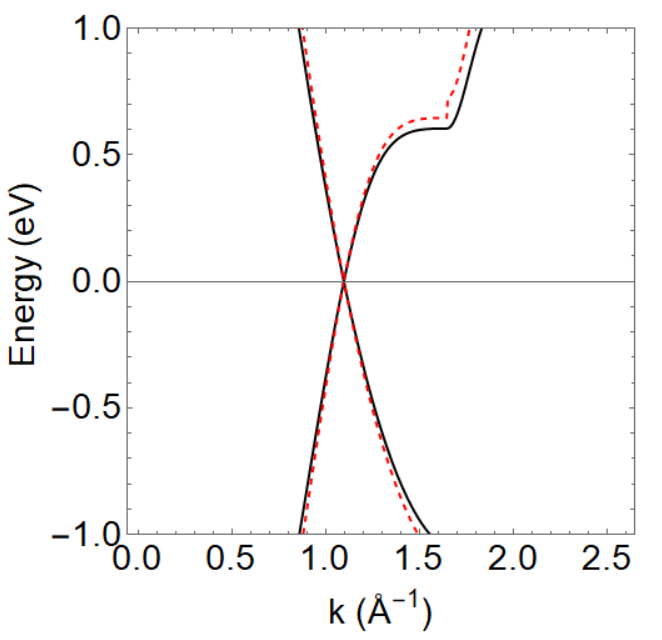


**Figure S1.** Band structure of optimized silicene at the K-point and around the Fermi level, featuring the and energy bands, and considering LDA (black) and GGA (red) calculations.


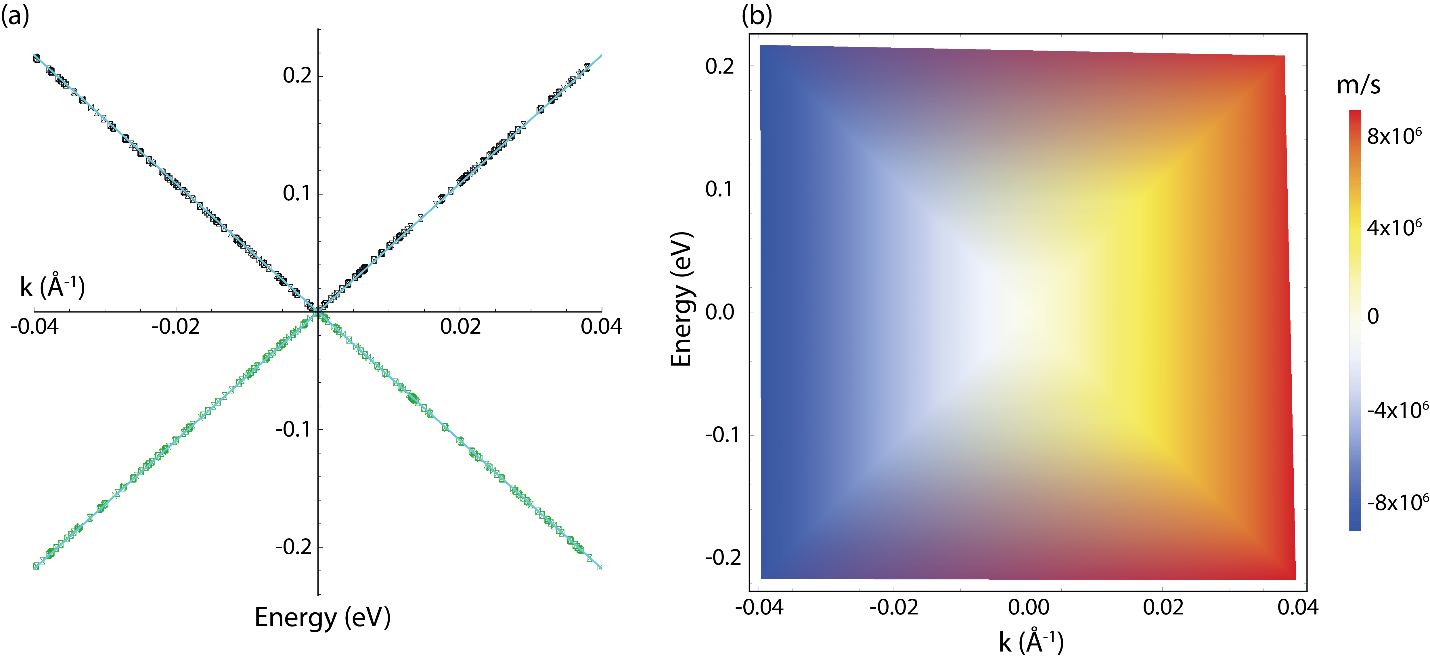


**Figure S2.** (a) DFT Band structure of graphene at the K-point and around the Fermi level, featuring the and energy bands in green and black respectively. The cyan line indicates a linear fit. (b) A color plot depicting the charge-carrier velocity (106 m/s) of graphene in the vicinity of the K-point. The plot shows how the velocity changes with energy and wavevector. The negative value of charge-carrier velocity refers to the velocity in the valence band.


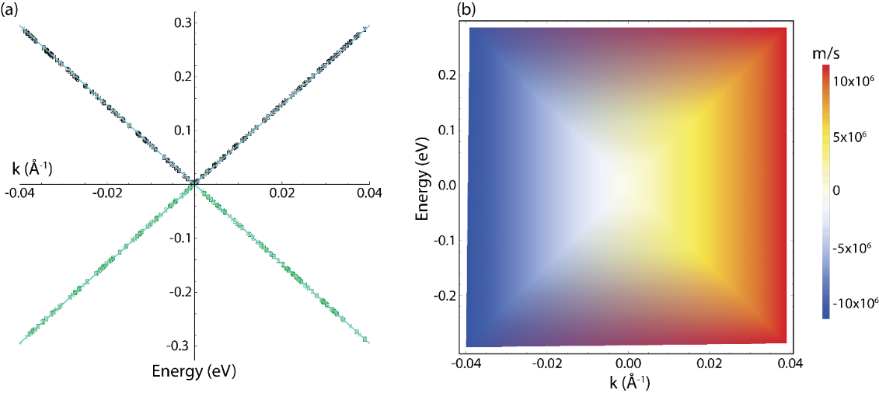


**Figure S3.** (a) GW Band structure of graphene at the K-point and around the Fermi level, featuring the and energy bands in green and black respectively. The cyan line indicates a linear fit. (b) A color plot depicting the charge-carrier velocity (106 m/s) of graphene in the vicinity of the K-point. The plot shows how the velocity changes with energy and wavevector. The negative value of charge-carrier velocity refers to the velocity in the valence band.
